# Supplementary material for: Neuronal and Astrocyte Insulin-like Growth Factor-1 Signaling Differentially Modulates Ischemic Stroke Damage
Source: PubMed Central journal article supplement — bioRxiv. 2023 Apr 2:2023.04.02.535245. Preprint. [Version 1] doi: 10.1101/2023.04.02.535245 (PMC10081310; doi:10.1101/2023.04.02.535245), 2023-04-02
Supplement: NIHPP2023.04.02.535245v1-supplement-1.pdf [file NIHPP2023.04.02.535245v1-supplement-1.pdf]

| Supplementary Table: Statistical Details |                              |               |       |             |          |
|------------------------------------------|------------------------------|---------------|-------|-------------|----------|
| Figure #                                 | Details                      | Type of Test  | n=    | Df(F-value) | p        |
| Figure 1B                                | NDS 3 hours                  | One-Way ANOVA | 6-7   | 3 (5.021)   | <0.001   |
| Figure 1C                                | ROI Signal to Background     | One-Way ANOVA | 16-37 | 3 (11.366)  | <0.001   |
| Figure 2B                                | IBA1+ cell count             | One-Way ANOVA | 18-24 | 3 (9.952)   | 1.11e-05 |
| Figure 2C                                | % Area                       | One-Way ANOVA | 18-24 | 3 (16.11)   | 2.33e-08 |
| Figure 2D                                | Average IBA1+ cell size      | One-Way ANOVA | 18-24 | 3 (12.12)   | 1.14e-06 |
| Figure 2E                                | Branch Length per IBA1+ cell | One-Way ANOVA | 18-24 | 3 (0.209)   | 0.89     |
| Figure 2F                                | End points per IBA1+cell     | One-Way ANOVA | 18-24 | 3 (5.156)   | 0.002    |
| Figure 4A                                | IL Total Protein             | One-Way ANOVA | 6     | 3 (3.208)   | 0.045    |
| Figure 4B                                | IL Amide I                   | One-Way ANOVA | 6     | 3 (5.68)    | 0.005    |
| Figure 4C                                | IL Amide II                  | One-Way ANOVA | 6     | 3 (8.997)   | 0.0005   |
| Figure 4D                                | IL Total Lipid               | One-Way ANOVA | 6     | 3 (14.78)   | 2.64e-05 |

|                        |                                  |                    |       |           |          |
|------------------------|----------------------------------|--------------------|-------|-----------|----------|
| Figure 4E              | IL $v_s(\text{CH}_2)$            | One-Way ANOVA      | 6     | 3 (16.77) | 1.1e-05  |
| Figure 4F              | IL $v_a(\text{CH}_2)$ ,          | One-Way ANOVA      | 6     | 3 (10.33) | 0.0002   |
| Figure 4G              | IL $v_a(\text{CH}_3)$            | One-Way ANOVA      | 6     | 3 (2.444) | 0.093    |
| Figure 4H              | IL Lipid Ester (C=O)             | One-Way ANOVA      | 6     | 3 (11.22) | 0.0001   |
| Figure 4I              | IL Olefin (CH)                   | One-Way ANOVA      | 6     | 3 (21.04) | 2.13e-06 |
| Figure 5B              | NDS 1 hour                       | 2-Way ANOVA GenxGr | 12-20 | 2 (5.729) | 0.005    |
|                        |                                  | Tx                 | 12-20 | 1 (3.938) | 0.050    |
|                        |                                  | Interactions       | 12-20 | 2 (1.162) | 0.317    |
| Figure 5C              | Average NDS Post-Stroke          | 2-Way ANOVA GenxGr | 12-20 | 2 (2.378) | 0.099    |
|                        |                                  | Tx                 | 12-20 | 1 (7.297) | 0.008    |
|                        |                                  | Interactions       | 12-20 | 2 (0.777) | 0.463    |
| Figure 5D              | Discrimination Index Post-Stroke | 2-Way ANOVA GenxGr | 10-19 | 2 (0.173) | 0.842    |
|                        |                                  | Tx                 | 10-19 | 1 (0.020) | 0.888    |
|                        |                                  | Interactions       | 10-19 | 2 (0.765) | 0.469    |
| Figure 5E              | % Right Paw Usage Post-Stroke    | 2-Way ANOVA GenxGr | 6-18  | 2 (0.150) | 0.861    |
|                        |                                  | Tx                 | 6-18  | 1 (0.354) | 0.554    |
|                        |                                  | Interactions       | 6-18  | 2 (1.299) | 0.280    |
| Figure 6B              | Infarct %                        | 2-Way ANOVA GenxGr | 13-20 | 2 (3.811) | 0.026    |
|                        |                                  | Tx                 | 13-20 | 1 (0.266) | 0.607    |
|                        |                                  | Interactions       | 13-20 | 2 (0.526) | 0.593    |
| Supplemental Figure 1A | CL Total Protein                 | One-Way ANOVA      | 6     | 3 (4.279) | 0.017    |
| Supplemental Figure 1B | CL Amide I                       | One-Way ANOVA      | 6     | 3 (1.113) | 0.367    |
| Supplemental Figure 1C | CL Amide II                      | One-Way ANOVA      | 6     | 3 (2.246) | 0.114    |
| Supplemental Figure 1D | CL Total Lipid                   | One-Way ANOVA      | 6     | 3 (0.923) | 0.448    |
| Supplemental Figure 1E | CL $v_s(\text{CH}_2)$            | One-Way ANOVA      | 6     | 3 (0.86)  | 0.478    |

|                        |                                     |               |   |           |       |
|------------------------|-------------------------------------|---------------|---|-----------|-------|
| Supplemental Figure 1F | CL <sub>v</sub> (CH <sub>2</sub> ), | One-Way ANOVA | 6 | 3 (2.285) | 0.11  |
| Supplemental Figure 1G | CL <sub>v</sub> (CH <sub>3</sub> )  | One-Way ANOVA | 6 | 3 (4.801) | 0.011 |
| Supplemental Figure 1H | CL Lipid Ester (C=O)                | One-Way ANOVA | 6 | 3 (6.761) | 0.002 |
| Supplemental Figure 1I | CL Olefin (CH)                      | One-Way ANOVA | 6 | 3 (3.169) | 0.046 |

### Supplemental Figure 1:

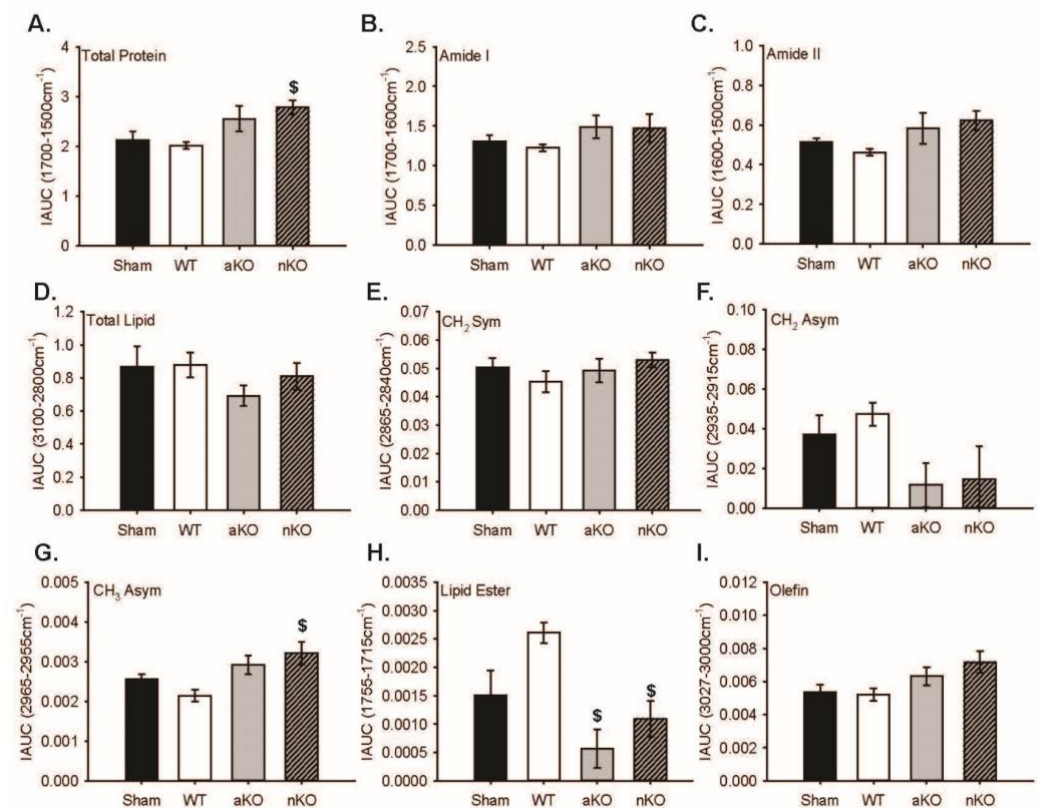

**Supplemental Figure: Healthy Hemisphere Biochemical Changes** (A-I) Quantitative integrated spectral ranges (IAUC) of total protein, Amide I, Amide II, total lipid, vs(CH<sub>2</sub>), va(CH<sub>2</sub>), va(CH<sub>3</sub>), lipid ester (C=O), and olefin (CH). Two slices per 3 mice were included in the data analysis and statistical comparisons (n=6). All data are expressed as mean  $\pm$  SEM and were compared using a one-way ANOVA with Tukey post-hoc. \* indicate significant difference ( $p < 0.05$ ) compared to sham group, and \$ indicate significant difference ( $p < 0.05$ ) compared to WT group. Abbreviations: nKO neuronal IGF-1R knockout, aKO astrocyte IGF-1R knockout, WT wildtype
